# Supplementary material for: Comparative Chemical Profiling and Antimicrobial/Anticancer Evaluation of Extracts from Farmed versus Wild Agelas oroides and Sarcotragus foetidus Sponges
Source: MDPI journal article supplement (doi:10.3390/md21120612), 2023-11-26
Supplement: s1 [file s1]

## Supplementary Material

# Comparative Chemical Profiling and Antimicrobial/Anticancer Evaluation of Extracts from Farmed versus Wild *Agelas oroides* and *Sarcotragus foetidus* Sponges

Despoina Varamogianni-Mamatsi <sup>1,2,3,4,†</sup>, Maria João Nunes <sup>5,†</sup>, Vanda Marques <sup>6</sup>,  
Thekla I. Anastasiou <sup>1</sup>, Eirini Kagiampaki <sup>1</sup>, Emmanouela Vernadou <sup>1</sup>, Thanos  
Dailianis <sup>1</sup>, Nicolas Kalogerakis <sup>2</sup>, Luís C. Branco <sup>5</sup>, Cecília M. P. Rodrigues <sup>6</sup>, Rita G.  
Sobral <sup>3,4</sup>, Susana P. Gaudêncio <sup>3,4,\*</sup> and Manolis Mandalakis <sup>1,\*</sup>

<sup>1</sup> Institute of Marine Biology, Biotechnology and Aquaculture, Hellenic Centre for Marine Research, Heraklion Crete, 71500, Greece; d.varamogianni@hcmr.gr (D.V.-M.); theanast@hcmr.gr (T.I.A.); e.kagiampaki@hcmr.gr (E.K.); e.vernadou@hcmr.gr (E.V.); thanosd@hcmr.gr (T.D.)

<sup>2</sup> School of Chemical and Environmental Engineering, Technical University of Crete, Chania, 73100, Greece; nicolas.kalogerakis@enveng.tuc.gr (N.K.)

<sup>3</sup> Associate Laboratory i4HB, Institute for Health and Bioeconomy, NOVA School of Science and Technology, NOVA University of Lisbon, Campus Caparica, 2819-516 Caparica, Portugal; rgs@fct.unl.pt (R.G.S.)

<sup>4</sup> UCIBIO—Applied Molecular Biosciences Unit, Chemistry and Life Sciences Departments, NOVA School of Science and Technology, NOVA University of Lisbon, Campus Caparica, 2819-516 Caparica, Portugal

<sup>5</sup> LAQV, REQUIMTE, Associated Laboratory for Green Chemistry, Chemistry Department, NOVA School of Science and Technology, NOVA University of Lisbon, Campus Caparica, 2819-516 Caparica, Portugal; mjm.nunes@fct.unl.pt (M.J.N.); l.branco@fct.unl.pt (L.C.B.)

<sup>6</sup> Research Institute for Medicines (iMed.Ulisboa), Faculty of Pharmacy, Universidade de Lisboa, Av. Professor Gama Pinto, 1649-003 Lisboa, Portugal; vismsmarques@ff.ulisboa.pt (V.M.); cmprodriques@ff.ulisboa.pt (C.M.P.R.)

<sup>†</sup> The authors equality contributed to this work.

<sup>\*</sup> Correspondence: mandalakis@hcmr.gr (M.M.); Tel.: +30-2810-337855 (M.M.); Fax: +30-2810-337822; s.gaudencio@fct.unl.pt (S.P.G.); Tel.: +351-212948300; Fax: +351-212948550

**Table S1.** Selected compounds for *A. oroides* extracts. Experimental retention time (RT), mode polarity (mode), collision energy, precursor ion, fragment ions and bibliographic references for SRM ions.

| Superclass | Class             | Chemical subclass        | Metabolite                           | RT (min) | Mode | Collision Energy (V) | Chemical formula                                                              | Chemical structure                                                                    | Precursor ion (m/z) | Fragments ions (m/z)                              | Ref for m/z |
|------------|-------------------|--------------------------|--------------------------------------|----------|------|----------------------|-------------------------------------------------------------------------------|---------------------------------------------------------------------------------------|---------------------|---------------------------------------------------|-------------|
| Alkaloids  | Pyrrole alkaloids | Linear pyrrole alkaloids | Dispacamide A                        | 12.52    | +    | 20                   | C <sub>11</sub> H <sub>11</sub> Br <sub>2</sub> N <sub>5</sub> O <sub>2</sub> | 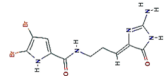   | 405.934             | 126.067;<br>138.068;<br>155.094                   | [71]        |
|            |                   |                          | Dispacamide B                        | 1.58     | +    | 10                   | C <sub>11</sub> H <sub>12</sub> BrN <sub>5</sub> O <sub>2</sub>               |    | 326.025             | 155.09;<br>326.00                                 | [71]        |
|            |                   |                          | Hymenidin                            | 11.35    | +    | 10                   | C <sub>11</sub> H <sub>12</sub> BrN <sub>5</sub> O                            |    | 310.029             | 80.050;<br>110.071;<br>122.071                    | GNPS        |
|            |                   |                          | Keramadine                           | 11.45    | +    | 20                   | C <sub>12</sub> H <sub>15</sub> BrN <sub>5</sub> O <sup>+</sup>               |    | 324.047             | 94.067;<br>136.088                                | [71]        |
|            |                   |                          | Oroidin                              | 12.89    | +    | 10                   | C <sub>11</sub> H <sub>11</sub> Br <sub>2</sub> N <sub>5</sub> O              |  | 389.938             | 80.05;<br>110.07;<br>122.07;<br>139.10;<br>389.94 | GNPS        |
|            |                   |                          | 4,5-Dibromopyrrole-2-carboxylic acid | 16.35    | –    | 20                   | C <sub>5</sub> H <sub>3</sub> Br <sub>2</sub> NO <sub>2</sub>                 |  | 267.920             | 223.920                                           | [154]       |

|                                |                          |              |   |    |                               |                                                                                       |         |                                             |      |
|--------------------------------|--------------------------|--------------|---|----|-------------------------------|---------------------------------------------------------------------------------------|---------|---------------------------------------------|------|
| Fused cyclic pyrrole alkaloids | 3-Debromohanishin        | 3.54         | + | 10 | $C_{11}H_{14}BrN_2O_3^+$      | 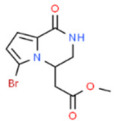   | 300.990 | 215.968;<br>254.978                         | [71] |
|                                | Dibromophakellin         | 12.88        | + | 40 | $C_{11}H_{11}Br_2N_5O$        |    | 387.940 | 249.975;<br>328.892                         | GNPS |
|                                | Longamide B              | 14.31        | + | 20 | $C_9H_8Br_2N_2O_3$            |    | 352.897 | 273.978;<br>292.876                         | [71] |
|                                | Longamide B methyl ester | 16.56        | + | 20 | $C_{10}H_{10}Br_2N_2O_3$      |    | 366.913 | 292.877                                     | [71] |
|                                | Monobromoisophakellin    | 2.06         | + | 10 | $C_{11}H_{12}BrN_5O$          |   | 310.029 | 250.982                                     | [70] |
|                                | Ageliferin               | Not Detected | + | 10 | $C_{22}H_{24}Br_2N_{10}O_2^+$ |  | 623.070 | 148.088;<br>160.888;<br>433.094;<br>450.120 | [71] |
| Dimeric pyrrole alkaloids      |                          |              |   |    |                               |                                                                                       |         |                                             |      |

|                         |              |   |    |                               |                                                                                      |         |                                            |       |
|-------------------------|--------------|---|----|-------------------------------|--------------------------------------------------------------------------------------|---------|--------------------------------------------|-------|
| Bromoageliferin         | 13.73        | + | 10 | $C_{22}H_{23}Br_3N_{10}O_2$   | 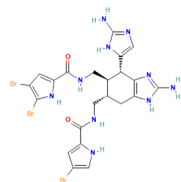  | 701.01  | 700.96                                     | [71]  |
| Debromosceptrin acetate | 26.33        | + | 20 | $C_{22}H_{25}BrN_{10}O_2$     |   | 541.142 | 177.114                                    | GNPS  |
| Nakamuric acid          | 26.21        | + | 20 | $C_{20}H_{21}Br_2N_7O_4$      |   | 584.008 | 584.000                                    | [155] |
| Oxysceptrin             | Not Detected | + | 40 | $C_{22}H_{25}Br_2N_{10}O_3^+$ |  | 637.000 | 148.000;<br>177.000;<br>247.000;<br>466.00 | [155] |

Terpenoid alkaloids

Sceptrin

18.14

+

20

C<sub>22</sub>H<sub>24</sub>Br<sub>2</sub>N<sub>10</sub>O<sub>2</sub>

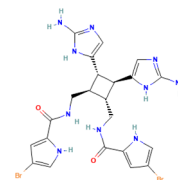

619.000

448.128;  
243.131

GNPS

Agelasidine A

26.16

+

20

C<sub>18</sub>H<sub>33</sub>N<sub>5</sub>O<sub>2</sub>S

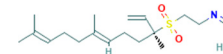

356.227

183.120;  
184.140

[154]

Agelasine

25.71

+

20

C<sub>26</sub>H<sub>40</sub>N<sub>5</sub><sup>+</sup>

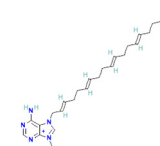

422.328

177.16

[156]

Agelasine A

26.62

+

20

C<sub>26</sub>H<sub>40</sub>ClN<sub>5</sub>

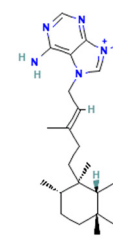

Cl<sup>-</sup>

458.304

457.336

PubChem

|         |                     |                                                  |       |    |                                                             |                                                                                     |                                                                                       |                                           |                     |      |
|---------|---------------------|--------------------------------------------------|-------|----|-------------------------------------------------------------|-------------------------------------------------------------------------------------|---------------------------------------------------------------------------------------|-------------------------------------------|---------------------|------|
|         | Agelasine E         | Not Detected                                     | +     | 40 | C <sub>26</sub> H <sub>40</sub> N <sub>5</sub> <sup>+</sup> | 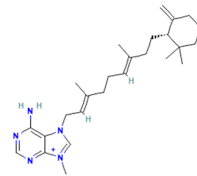 | 422.327                                                                               | 95.086;<br>121.01;<br>150.077;<br>423.331 | GNPS                |      |
| Indoles | 4,6-Dihydroxyindole | 2.82                                             | +     | 10 | C <sub>8</sub> H <sub>7</sub> NO <sub>2</sub>               |  | 150.055                                                                               | 132.045;<br>133.029                       | FoodB               |      |
| Lipids  | Fatty acyls         | 10-Methyl-9(Z)-octadecenoic acid                 | 26.18 | –  | 40                                                          | C <sub>19</sub> H <sub>36</sub> O <sub>2</sub>                                      |    | 297.000                                   | 183.000             | [81] |
|         | Glycerolipids       | 2,3-Dihydroxypropyl(Z)-10-methyloctadec-9-enoate | 25.37 | +  | 10                                                          | C <sub>22</sub> H <sub>42</sub> O <sub>4</sub>                                      |    | 371.000                                   | 279.000;<br>297.000 | [81] |
|         | Steroids            | 20-Hydroxyecdysone-22-acetate                    | 26.04 | +  | 20                                                          | C <sub>29</sub> H <sub>46</sub> O <sub>8</sub>                                      |  | 523.337                                   | 299.154;<br>531.331 | GNPS |

|                    |                      |              |   |    |                   |                                                                                     |         |                     |       |
|--------------------|----------------------|--------------|---|----|-------------------|-------------------------------------------------------------------------------------|---------|---------------------|-------|
|                    | $\beta$ -ecdysterone | 25.64        | + | 40 | $C_{27}H_{44}O_7$ | 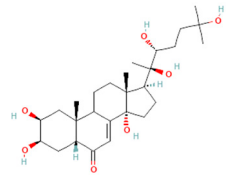 | 481.310 | 280.999;<br>299.154 | GNPS  |
|                    | Ponasterone-A        | Not Detected | – | 10 | $C_{27}H_{44}O_6$ |  | 464.000 | 463.000;<br>928.000 | MoNA  |
| <b>Polyketides</b> | Trichodermanone C    | Not Detected | – | 40 | $C_{20}H_{26}O_8$ |  | 393.115 | 205.000;<br>247.000 | [157] |

**Table S2.** The relative percentages of the metabolite components identified among the *A. oroides* extracts. –; Not Detected.

| %Content                             |         |         |         |           |           |           |
|--------------------------------------|---------|---------|---------|-----------|-----------|-----------|
| Metabolite                           | Wild #1 | Wild #2 | Wild #3 | Farmed #1 | Farmed #2 | Farmed #3 |
| Dispacamide A                        | 2.7%    | 1.1%    | 2.4%    | 1.5%      | 1.4%      | 1.8%      |
| Dispacamide B                        | 1.2%    | 5.5%    | 2.1%    | 8.3%      | 6.3%      | 8.9%      |
| Hymenidin                            | 2.6%    | 0.9%    | 0.7%    | 0.6%      | 0.6%      | 1.7%      |
| Keramadine                           | 0.5%    | 5.9%    | 4.5%    | 7.2%      | 6.8%      | 10.0%     |
| Oroidin                              | 82.8%   | 75.8%   | 82.7%   | 70.8%     | 73.0%     | 66.9%     |
| 4,5-Dibromopyrrole-2-carboxylic acid | 6.9%    | 7.2%    | 6.4%    | 7.6%      | 6.1%      | 6.0%      |
| 3-Debromohanishin                    | <0.01%  | <0.01%  | <0.01%  | <0.01%    | <0.01%    | <0.01%    |
| Dibromophakellin                     | 0.7%    | 0.7%    | 0.8%    | 0.6%      | 0.6%      | 0.6%      |
| Longamide B                          | 0.02%   | 0.02%   | 0.05%   | 0.01%     | 0.01%     | 0.01%     |
| Longamide B methyl ester             | 0.1%    | 0.1%    | 0.1%    | 0.1%      | 0.1%      | 0.1%      |
| Monobromoisophakellin                | 0.01%   | 0.01%   | <0.01%  | 0.01%     | 0.01%     | 0.01%     |

|                                                         |        |        |        |        |        |        |
|---------------------------------------------------------|--------|--------|--------|--------|--------|--------|
| <b>Ageliferin</b>                                       | <0.01% | –      | –      | –      | –      | –      |
| <b>Bromoageliferin</b>                                  | 0.01%  | 0.02%  | <0.01% | 0.01%  | 0.01%  | 0.01%  |
| <b>Debromosceptrin acetate</b>                          | 0.1%   | 0.1%   | 0.01%  | 0.1%   | 0.1%   | 0.1%   |
| <b>Nakamuric acid</b>                                   | 0.3%   | 0.1%   | 0.01%  | 0.2%   | 0.3%   | 0.2%   |
| <b>Oxysceptrin</b>                                      | <0.01% | –      | –      | –      | –      | –      |
| <b>Sceptrin</b>                                         | <0.01% | <0.01% | <0.01% | <0.01% | <0.01% | –      |
| <b>Agelasidine A</b>                                    | 0.1%   | 0.1%   | 0.01%  | 0.1%   | 0.1%   | 0.1%   |
| <b>Agelasine</b>                                        | 0.1%   | 0.1%   | 0.01%  | 0.1%   | 0.1%   | 0.1%   |
| <b>Agelasine A</b>                                      | 0.8%   | 0.7%   | 0.1%   | 1.1%   | 1.2%   | 0.9%   |
| <b>Agelasine E</b>                                      | <0.01% | –      | <0.01% | –      | <0.01% | –      |
| <b>4,6-Dihydroxyindole</b>                              | 0.01%  | 0.1%   | <0.01% | 0.01%  | 0.01%  | 0.1%   |
| <b>10-Methyl-9(Z)-octadecenoic acid</b>                 | 1.1%   | 1.9%   | 0.1%   | 1.7%   | 3.2%   | 2.4%   |
| <b>2,3-Dihydroxypropyl(Z)-10-methyloctadec-9-enoate</b> | <0.01% | <0.01% | <0.01% | <0.01% | <0.01% | 0.01%  |
| <b>20-Hydroxyecdysone-22-acetate</b>                    | <0.01% | <0.01% | <0.01% | <0.01% | 0.01%  | <0.01% |

|                          |        |       |        |       |        |        |
|--------------------------|--------|-------|--------|-------|--------|--------|
| <b>β-ecdysterone</b>     | 0.01%  | 0.01% | <0.01% | 0.01% | 0.01%  | <0.01% |
| <b>Ponasterone-A</b>     | 0.01%  | –     | –      | –     | <0.01% | –      |
| <b>Trichodermanone C</b> | <0.01% | –     | –      | –     | –      | –      |

---

**Table S3.** Weight-normalized peak intensity values of the metabolite components identified among the *A. oroides* extracts, related to their production levels within sponges. –; Not Detected.

| Metabolite                           | Weight-normalized Intensity (Intensity g <sub>sponge</sub> <sup>-1</sup> ) |          |         |           |           |           |
|--------------------------------------|----------------------------------------------------------------------------|----------|---------|-----------|-----------|-----------|
|                                      | Wild #1                                                                    | Wild #2  | Wild #3 | Farmed #1 | Farmed #2 | Farmed #3 |
| Dispacamide A                        | 2.7E+10                                                                    | 10.0E+10 | 2.1E+11 | 1.8E+10   | 2.0E+10   | 2.4E+10   |
| Dispacamide B                        | 1.2E+10                                                                    | 5.2E+10  | 1.8E+11 | 9.6E+10   | 9.3E+10   | 1.2E+11   |
| Hymenidin                            | 2.6E+10                                                                    | 8.1E+09  | 6.4E+10 | 7.4E+09   | 9.0E+09   | 2.2E+10   |
| Keramadine                           | 4.5E+09                                                                    | 5.6E+10  | 4.0E+11 | 8.3E+10   | 1.0E+11   | 1.3E+11   |
| Oroidin                              | 8.2E+11                                                                    | 7.2E+11  | 7.3E+12 | 8.2E+11   | 1.1E+12   | 8.9E+11   |
| 4,5-Dibromopyrrole-2-carboxylic acid | 6.8E+10                                                                    | 6.8E+10  | 5.6E+11 | 8.9E+10   | 9.0E+10   | 8.0E+10   |
| 3-Debromohanishin                    | 3.1E+07                                                                    | 7.0E+07  | 2.3E+07 | 2.3E+07   | 1.2E+08   | 3.1E+07   |
| Dibromophakellin                     | 7.2E+09                                                                    | 6.6E+09  | 7.0E+10 | 7.4E+09   | 9.4E+09   | 7.9E+09   |
| Longamide B                          | 2.1E+08                                                                    | 2.3E+08  | 4.5E+09 | 1.3E+08   | 2.2E+08   | 9.8E+07   |
| Longamide B methyl ester             | 1.1E+09                                                                    | 8.3E+08  | 1.1E+10 | 1.1E+09   | 1.1E+09   | 8.1E+08   |
| Monobromoisophakellin                | 1.3E+08                                                                    | 8.0E+07  | 2.8E+07 | 1.3E+08   | 8.3E+07   | 1.2E+08   |
| Ageliferin                           | 4.9E+06                                                                    | –        | –       | –         | –         | –         |
| Bromoageliferin                      | 8.2E+07                                                                    | 1.5E+08  | 4.8E+07 | 1.3E+08   | 8.0E+07   | 8.8E+07   |
| Debromosceptrin acetate              | 9.6E+08                                                                    | 7.5E+08  | 7.4E+08 | 7.4E+08   | 2.1E+09   | 1.8E+09   |
| Nakamuric acid                       | 2.6E+09                                                                    | 10.0E+08 | 9.5E+08 | 2.7E+09   | 4.7E+09   | 3.2E+09   |
| Oxysceptrin                          | 1.0E+07                                                                    | –        | –       | –         | –         | –         |

|                                                          |         |         |         |         |         |         |
|----------------------------------------------------------|---------|---------|---------|---------|---------|---------|
| Sceptrin                                                 | 9.3E+06 | 6.7E+06 | 2.6E+07 | 3.6E+06 | 1.6E+07 | –       |
| Agelasidine A                                            | 9.6E+08 | 4.3E+08 | 4.8E+08 | 9.3E+08 | 1.8E+09 | 1.9E+09 |
| Agelasine                                                | 1.2E+09 | 7.7E+08 | 6.5E+08 | 1.6E+09 | 1.9E+09 | 1.8E+09 |
| Agelasine A                                              | 7.5E+09 | 7.0E+09 | 4.2E+09 | 1.2E+10 | 1.8E+10 | 1.2E+10 |
| Agelasine E                                              | 8.2E+06 | –       | 2.6E+07 | –       | 9.2E+06 | –       |
| 4,6-Dihydroxyindole                                      | 1.4E+08 | 4.8E+08 | 9.0E+07 | 9.0E+07 | 1.5E+08 | 8.7E+08 |
| 10-Methyl-9(Z)-<br>octadecenoic acid                     | 1.1E+10 | 1.8E+10 | 1.1E+10 | 1.9E+10 | 4.7E+10 | 3.2E+10 |
| 2,3-Dihydroxypropyl(Z)-<br>10-methyloctadec-9-<br>enoate | 2.6E+07 | 1.8E+07 | 1.9E+07 | 3.5E+06 | 3.3E+07 | 7.5E+07 |
| 20-Hydroxyecdysone-22-<br>acetate                        | 4.8E+07 | 4.1E+07 | 2.2E+07 | 4.9E+07 | 8.7E+07 | 3.9E+07 |
| β-ecdysterone                                            | 1.1E+08 | 6.7E+07 | 1.1E+07 | 5.9E+07 | 2.0E+08 | 3.0E+07 |
| Ponasterone-A                                            | 5.8E+07 | –       | –       | –       | 2.7E+07 | –       |
| Trichodermanone C                                        | 3.4E+06 | –       | –       | –       | –       | –       |

---

**Table S4.** Selected compounds for *S. foetidus* extracts. Experimental retention time (RT), mode polarity (mode), collision energy, precursor ion, fragment ions and bibliographic references for SRM ions.

| Superclass | Chemical class                    | Metabolite                   | RT (min) | Mode | Collision Energy (V) | Chemical formula                               | Chemical structure                                                                    | Precursor ion (m/z) | Fragment ions (m/z)                       | Ref for m/z |
|------------|-----------------------------------|------------------------------|----------|------|----------------------|------------------------------------------------|---------------------------------------------------------------------------------------|---------------------|-------------------------------------------|-------------|
| Benzenoids | Anthracenes                       | Emodin                       | 4.23     | +    | 10                   | C <sub>15</sub> H <sub>10</sub> O <sub>5</sub> | 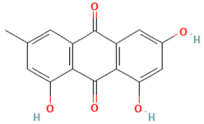   | 271.060             | 139.054;<br>225.055                       | GNPS        |
|            |                                   | Endocrocin                   | 19.51    | –    | 10                   | C <sub>16</sub> H <sub>10</sub> O <sub>7</sub> |    | 313.035             | 269.046;<br>313.037                       | GNPS        |
|            | Benzene & substituted derivatives | 3-Phenylpropane-1,2-diol     | 1.54     | +    | 10                   | C <sub>9</sub> H <sub>12</sub> O <sub>2</sub>  |    | 153.092             | 91.055;<br>93.070;<br>135.081;<br>153.092 | DrugBank    |
|            |                                   | 3,4-Dimethoxybenzoic acid    | 1.52     | +    | 20                   | C <sub>9</sub> H <sub>10</sub> O <sub>4</sub>  |   | 183.180             | 126.046;<br>152.062                       | GNPS        |
|            |                                   | 8-O-4'-Dehydrodiferulic acid | 20.53    | +    | 10                   | C <sub>20</sub> H <sub>18</sub> O <sub>8</sub> |  | 387.108             | 195.066;<br>351.087                       | HMDB        |

|                    |                                                          |      |   |    |                                                |                                                                                       |         |                                   |       |
|--------------------|----------------------------------------------------------|------|---|----|------------------------------------------------|---------------------------------------------------------------------------------------|---------|-----------------------------------|-------|
|                    | Toluate                                                  | 1.50 | + | 10 | C <sub>8</sub> H <sub>8</sub> O <sub>2</sub>   | 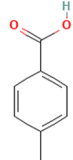   | 137.060 | 91.0555;<br>109.0661;<br>137.0597 | [101] |
|                    | 3-Isochromanone                                          | 1.50 | + | 10 | C <sub>9</sub> H <sub>8</sub> O <sub>2</sub>   |    | 149.061 | 105.035;<br>121.028               | [101] |
| <b>Benzopyrans</b> |                                                          |      |   |    |                                                |                                                                                       |         |                                   |       |
|                    | 7-Hydroxy-2-(2-hydroxypropyl)-5-methylchromone (Aloesol) | 1.51 | + | 10 | C <sub>13</sub> H <sub>14</sub> O <sub>4</sub> |    | 235.097 | 191.071;<br>217.087;<br>235.070   | HMDB  |
|                    | 4-Hydroxyphenylacetic acid                               | 4.46 | + | 20 | C <sub>8</sub> H <sub>8</sub> O <sub>3</sub>   |    | 153.055 | 95.049;<br>107.049                | GNPS  |
| <b>Phenols</b>     |                                                          |      |   |    |                                                |                                                                                       |         |                                   |       |
|                    | Tyrosol                                                  | 1.91 | + | 20 | C <sub>8</sub> H <sub>10</sub> O <sub>2</sub>  |  | 121.064 | 71.970                            | GNPS  |

|             |                                                                                         |       |   |    |                                                 |                                                                                       |         |                                 |         |
|-------------|-----------------------------------------------------------------------------------------|-------|---|----|-------------------------------------------------|---------------------------------------------------------------------------------------|---------|---------------------------------|---------|
| Dipeptides  | 3-Nitropropionic acid                                                                   | 1.39  | + | 10 | C <sub>3</sub> H <sub>5</sub> NO <sub>4</sub>   | 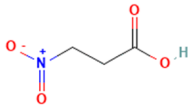   | 120.029 | 91.054;<br>100.001;<br>100.505  | GNPS    |
| Indoles     | Indole-3-methylethanoate                                                                | 1.49  | + | 20 | C <sub>11</sub> H <sub>11</sub> NO <sub>2</sub> |    | 190.087 | 103.055;<br>128.049;<br>130.065 | PubChem |
| Fatty acyls | N-hexadecanoyl-L-homoserine lactone                                                     | 12.05 | + | 10 | C <sub>20</sub> H <sub>37</sub> NO <sub>3</sub> |    | 340.283 | 298.275;<br>322.274             | [101]   |
| Lipids      | 1-O-(2,3,4,5-tetrahydroxycyclopentyl)-3-O-hexadecylglycerol                             | 27.44 | + | 10 | C <sub>24</sub> H <sub>48</sub> O <sub>7</sub>  |    | 471.329 | 471.000                         | [105]   |
|             | Glycerolipids<br>1-O-(2,3,4,5-tetrahydroxycyclopentyl)-3-O-(10-methylhexadecyl)glycerol | 28.23 | + | 10 | C <sub>25</sub> H <sub>50</sub> O <sub>7</sub>  |  | 485.343 | 245.000;<br>485.000             | [105]   |

|               |                                                  |       |   |    |                                                |                                                                                       |         |                                 |       |
|---------------|--------------------------------------------------|-------|---|----|------------------------------------------------|---------------------------------------------------------------------------------------|---------|---------------------------------|-------|
|               | Monovaccenin                                     | 26.24 | + | 10 | C <sub>21</sub> H <sub>40</sub> O <sub>4</sub> | 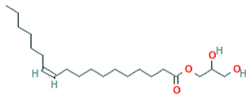   | 357.000 | 321.279;<br>339.282;<br>357.300 | HMDB  |
|               | 7 <i>E</i> ,12 <i>E</i> ,20 <i>Z</i> -Variabilin | 25.61 | + | 20 | C <sub>25</sub> H <sub>34</sub> O <sub>4</sub> |    | 399.254 | 107.083;<br>135.078             | GNPS  |
|               | 4-Hydroxy-3-tetraprenylbenzoic acid              | 27.75 | + | 10 | C <sub>27</sub> H <sub>38</sub> O <sub>3</sub> |    | 411.287 | 151.038;<br>411.287             | GNPS  |
| Prenol lipids | 1,4-Dihydroxy-2-tetraprenylbenzene               | 28.67 | + | 10 | C <sub>26</sub> H <sub>38</sub> O <sub>2</sub> |    | 383.292 | 109.1007;<br>383.2932           | GNPS  |
|               | (+)-12,15-Dihydroxycurcuphenol                   | 23.12 | + | 20 | C <sub>15</sub> H <sub>22</sub> O <sub>3</sub> |  | 251.164 | 59.050;<br>149.025              | [101] |

|          |                                                                    |       |   |    |                                                |                                                                                       |         |                     |       |
|----------|--------------------------------------------------------------------|-------|---|----|------------------------------------------------|---------------------------------------------------------------------------------------|---------|---------------------|-------|
| Steroids | 24-Methylcholest-7-en-3 $\beta$ -ol                                | 22.68 | + | 40 | C <sub>28</sub> H <sub>48</sub> O              | 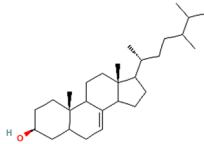   | 400.371 | 85.102;<br>297.852  | FoodB |
|          | 24-Methylcholesta-5,7-dien-3 $\beta$ -ol (22,23-Dihydroergosterol) | 12.52 | + | 10 | C <sub>28</sub> H <sub>46</sub> O              |    | 398.355 | 381.352;<br>399.363 | HMDB  |
|          | 24-Methylcholesta-7,22-dien-3 $\beta$ -ol (Stellasterol)           | 11.58 | + | 10 | C <sub>28</sub> H <sub>46</sub> O              |    | 398.355 | 295.243;<br>399.363 | FoodB |
|          | 24-Methylcholesta-5,7,22-trien-3 $\beta$ -ol (Ergosterol)          | 12.51 | + | 10 | C <sub>28</sub> H <sub>44</sub> O              |   | 397.35  | 204.118;<br>397.116 | GNPS  |
|          | Cholest-7-en-3 $\beta$ -yl acetate                                 | 27.15 | + | 10 | C <sub>29</sub> H <sub>48</sub> O <sub>2</sub> |  | 429.372 | 159.115;<br>411.362 | GNPS  |

|             |                                                                |       |   |    |                                                  |                                                                                       |         |                                    |      |
|-------------|----------------------------------------------------------------|-------|---|----|--------------------------------------------------|---------------------------------------------------------------------------------------|---------|------------------------------------|------|
|             | Cholesta-5,7-dien-3 $\beta$ -ol<br>( $\Delta^7$ -Cholesterol)  | 27.85 | + | 10 | C <sub>27</sub> H <sub>44</sub> O                | 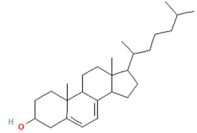   | 385.346 | 161.1325;<br>173.1326;<br>367.3349 | GNPS |
|             | 3,8-Dihydroxy-6-methoxy-8-methylxanthone<br>(Griseoxanthone C) | 23.17 | + | 10 | C <sub>15</sub> H <sub>12</sub> O <sub>5</sub>   |    | 273.075 | 230.0581;<br>273.0766              | GNPS |
|             | Chrysophanol                                                   | 1.53  | + | 10 | C <sub>15</sub> H <sub>10</sub> O <sub>4</sub>   |    | 255.066 | 209.060;<br>255.065                | GNPS |
| Polyketides | Dechlorogriseofulvin                                           | 14.99 | + | 20 | C <sub>17</sub> H <sub>18</sub> O <sub>6</sub>   |    | 319.118 | 165.054                            | GNPS |
|             | Griseofulvin                                                   | 1.53  | + | 10 | C <sub>17</sub> H <sub>17</sub> ClO <sub>6</sub> |   | 353.079 | 385.079;<br>353.079                | GNPS |
|             | Norlichexanthone                                               | 21.03 | – | 10 | C <sub>14</sub> H <sub>10</sub> O <sub>5</sub>   |  | 257.045 | 257.108;<br>257.304;<br>257.0455   | GNPS |

**Table S5.** The relative percentages of the metabolite components identified among the *S. foetidus* extracts. –; Not Detected.

| Metabolite                   | %Content |         |         |           |           |           |
|------------------------------|----------|---------|---------|-----------|-----------|-----------|
|                              | Wild #1  | Wild #2 | Wild #3 | Farmed #1 | Farmed #2 | Farmed #3 |
| Emodin                       | <0.01%   | <0.01%  | <0.01%  | –         | <0.01%    | –         |
| Endocrocin                   | <0.01%   | <0.01%  | 0.01%   | <0.01%    | <0.01%    | <0.01%    |
| 3-Phenylpropane-1,2-diol     | 0.4%     | 0.4%    | 0.5%    | 0.2%      | 0.3%      | 0.4%      |
| 3,4-Dimethoxybenzoic acid    | 0.1%     | 0.1%    | 0.1%    | 0.1%      | 0.1%      | 0.1%      |
| 8-O-4'-Dehydrodiferulic acid | 1.2%     | 1.8%    | 1.8%    | 1.3%      | 1.1%      | 1.5%      |
| Toluate                      | 2.8%     | 2.1%    | 1.5%    | 1.8%      | 1.8%      | 1.5%      |
| 3-Isochromanone              | 0.1%     | 0.1%    | 0.2%    | 0.1%      | 0.1%      | 0.1%      |

|                                                                         |       |        |        |        |        |        |
|-------------------------------------------------------------------------|-------|--------|--------|--------|--------|--------|
| 7-Hydroxy-2-(2-hydroxypropyl)-5-methylchromone                          | 0.4%  | 0.2%   | 0.5%   | 0.4%   | 0.3%   | 0.3%   |
| 4-Hydroxyphenylacetic acid                                              | 0.01% | <0.01% | 0.01%  | <0.01% | <0.01% | <0.01% |
| Tyrosol                                                                 | 0.01% | 0.01%  | <0.01% | 0.01%  | <0.01% | 0.01%  |
| 3-Nitropropionic acid                                                   | 0.01% | 0.01%  | 0.02%  | 0.02%  | 0.01%  | 0.01%  |
| Indole-3-methylethanoate                                                | 0.1%  | 0.1%   | 0.1%   | 0.1%   | 0.3%   | 0.1%   |
| N-hexadecanoyl-L-homoserine lactone                                     | 56.2% | 54.1%  | 56.3%  | 55.9%  | 56.7%  | 56.0%  |
| 1-O-(2,3,4,5-tetrahydroxycyclopentyl)-3-O-(10-methylhexadecyl) glycerol | 2.3%  | 2.4%   | 2.6%   | 2.6%   | 2.3%   | 2.5%   |
| 1-O-(2,3,4,5-tetrahydroxycyclopentyl)-3-O-hexadecylglycerol             | 0.2%  | 0.3%   | 0.2%   | 0.2%   | 0.3%   | 0.4%   |
| Monovaccenin                                                            | 4.2%  | 4.9%   | 4.4%   | 4.9%   | 4.7%   | 4.5%   |
| 7E,12E,20Z-Variabilin                                                   | 0.03% | 0.01%  | 0.01%  | 0.01%  | 0.01%  | 0.01%  |

|                                                                           |        |        |        |        |        |        |
|---------------------------------------------------------------------------|--------|--------|--------|--------|--------|--------|
| <b>4-Hydroxy-3-tetraprenylbenzoic acid</b>                                | 1.1%   | 1.8%   | 0.9%   | 2.2%   | 2.7%   | 3.0%   |
| <b>1,4-Dihydroxy-2-tetraprenylbenzene</b>                                 | 0.04%  | 0.2%   | 0.4%   | 0.4%   | 0.4%   | 0.5%   |
| <b>(+)-12,15-Dihydroxycurcuphenol</b>                                     | <0.01% | 0.01%  | <0.01% | 0.03%  | 0.06%  | 0.05%  |
| <b>24-Methylcholest-7-en-3<math>\beta</math>-ol</b>                       | 0.07%  | 0.05%  | 0.08%  | 0.05%  | 0.08%  | 0.05%  |
| <b>24-Methylcholesta-5,7-dien-3<math>\beta</math>-ol</b>                  | 0.01%  | 0.02%  | 0.02%  | 0.01%  | 0.02%  | 0.03%  |
| <b>24-Methylcholesta-7,22-dien-3<math>\beta</math>-ol</b>                 | 0.01%  | 0.01%  | 0.01%  | 0.01%  | 0.01%  | 0.01%  |
| <b>24-Methylcholesta-5,7,22-trien-3<math>\beta</math>-ol (Ergosterol)</b> | 29.9%  | 30.8%  | 29.3%  | 29.0%  | 28.4%  | 28.3%  |
| <b>Cholest-7-en-3<math>\beta</math>-yl acetate</b>                        | –      | <0.01% | <0.01% | <0.01% | <0.01% | <0.01% |
| <b>Cholesta-5,7-dien-3<math>\beta</math>-ol</b>                           | 0.05%  | 0.07%  | 0.05%  | 0.06%  | 0.06%  | 0.06%  |
| <b>3,8-Dihydroxy-6-methoxy-8-methylxanthone</b>                           | 0.3%   | 0.3%   | 0.3%   | 0.3%   | 0.3%   | 0.3%   |

|                             |        |        |        |        |        |      |
|-----------------------------|--------|--------|--------|--------|--------|------|
| <b>Chrysophanol</b>         | 0.4%   | 0.3%   | 0.3%   | 0.2%   | 0.3%   | 0.2% |
| <b>Dechlorogriseofulvin</b> | <0.01% | <0.01% | <0.01% | <0.01% | <0.01% | –    |
| <b>Griseofulvin</b>         | 0.2%   | 0.1%   | 0.2%   | 0.1%   | 0.1%   | 0.1% |
| <b>Norlichexanthone</b>     | 0.1%   | 0.1%   | 0.1%   | 0.1%   | 0.1%   | 0.1% |

---

**Table S6.** Weight-normalized peak intensity values of the metabolite components identified among the *S. foetidus* extracts, related to their production levels within sponges. –; Not Detected.

| Metabolite                   | Weight-normalized Intensity (Intensity g <sub>sponge</sub> <sup>-1</sup> ) |         |         |           |           |           |
|------------------------------|----------------------------------------------------------------------------|---------|---------|-----------|-----------|-----------|
|                              | Wild #1                                                                    | Wild #2 | Wild #3 | Farmed #1 | Farmed #2 | Farmed #3 |
| Emodin                       | 1.7E+07                                                                    | 7.3E+07 | 2.2E+08 | –         | 2.0E+07   | –         |
| Endocrocin                   | 3.3E+07                                                                    | 2.4E+08 | 4.2E+08 | 5.0E+07   | 4.4E+07   | 3.0E+07   |
| 3-Phenylpropane-1,2-diol     | 1.9E+10                                                                    | 1.9E+10 | 2.3E+10 | 1.1E+10   | 1.1E+10   | 2.4E+10   |
| 3,4-Dimethoxybenzoic acid    | 3.1E+09                                                                    | 2.9E+09 | 4.4E+09 | 3.2E+09   | 2.3E+09   | 3.1E+09   |
| 8-O-4'-Dehydrodiferulic acid | 6.0E+10                                                                    | 9.7E+10 | 9.0E+10 | 7.0E+10   | 4.5E+10   | 9.7E+10   |
| Toluate                      | 1.4E+11                                                                    | 1.1E+11 | 7.8E+10 | 9.4E+10   | 6.0E+10   | 9.6E+10   |
| 3-Isochromanone              | 6.5E+09                                                                    | 6.2E+09 | 1.1E+10 | 6.2E+09   | 5.9E+09   | 8.5E+09   |

|                                                                               |         |         |         |         |         |         |
|-------------------------------------------------------------------------------|---------|---------|---------|---------|---------|---------|
| <b>7-Hydroxy-2-(2-hydroxypropyl)-5-methylchromone</b>                         | 2.0E+10 | 1.3E+10 | 2.7E+10 | 1.9E+10 | 1.2E+10 | 1.7E+10 |
| <b>4-Hydroxyphenylacetic acid</b>                                             | 2.7E+08 | 8.1E+07 | 2.6E+08 | 1.4E+08 | 1.1E+08 | 1.4E+08 |
| <b>Tyrosol</b>                                                                | 3.9E+08 | 3.5E+08 | 1.5E+08 | 3.0+08  | 1.0E+08 | 3.5E+08 |
| <b>3-Nitropropionic acid</b>                                                  | 7.3E+08 | 7.0E+08 | 1.2E+09 | 1.0E+09 | 6.4E+08 | 5.8E+08 |
| <b>Indole-3-methylethanoate</b>                                               | 5.0E+09 | 5.4E+09 | 6.6E+09 | 3.7E+09 | 1.2E+10 | 5.8E+09 |
| <b>N-hexadecanoyl-L-homoserine lactone</b>                                    | 2.8E+12 | 3.0E+12 | 2.8E+12 | 3.0E+12 | 2.4E+12 | 3.7E+12 |
| <b>1-O-(2,3,4,5-tetrahydroxycyclopentyl)-3-O-(10-methylhexadecyl)glycerol</b> | 1.2E+11 | 1.3E+11 | 1.3E+11 | 1.4E+11 | 1.0E+11 | 1.6E+11 |
| <b>1-O-(2,3,4,5-tetrahydroxycyclopentyl)-3-O-hexadecylglycerol</b>            | 9.6E+09 | 1.6E+10 | 1.1E+10 | 1.1E+10 | 1.1E+10 | 2.4E+10 |
| <b>Monovaccenin</b>                                                           | 2.1E+11 | 2.7E+11 | 2.2E+11 | 2.6E+11 | 2.0E+11 | 2.9E+11 |
| <b>7E,12E,20Z-Variabilin</b>                                                  | 1.6E+09 | 6.4E+08 | 5.1E+08 | 3.0E+08 | 6.0E+08 | 9.5E+08 |

|                                                                           |         |          |         |         |         |         |
|---------------------------------------------------------------------------|---------|----------|---------|---------|---------|---------|
| <b>4-Hydroxy-3-tetraprenylbenzoic acid</b>                                | 5.6E+10 | 9.6E+10  | 4.5E+10 | 1.2E+11 | 1.1E+11 | 2.0E+11 |
| <b>1,4-Dihydroxy-2-tetraprenylbenzene</b>                                 | 1.9E+09 | 10.0E+10 | 1.9E+10 | 2.1E+10 | 1.9E+10 | 3.3E+10 |
| <b>(+)-12,15-Dihydroxycurcuphenol</b>                                     | 3.2E+07 | 3.3E+08  | 4.3E+07 | 1.7E+09 | 2.6E+09 | 3.1E+09 |
| <b>24-Methylcholest-7-en-3<math>\beta</math>-ol</b>                       | 3.5E+09 | 2.6E+09  | 3.9E+09 | 2.5E+09 | 3.3E+09 | 3.1E+09 |
| <b>24-Methylcholesta-5,7-dien-3<math>\beta</math>-ol</b>                  | 5.6E+08 | 1.3E+09  | 1.1E+09 | 6.1E+08 | 8.7E+08 | 2.0E+09 |
| <b>24-Methylcholesta-7,22-dien-3<math>\beta</math>-ol</b>                 | 6.4E+08 | 3.5E+08  | 6.5E+08 | 4.1E+08 | 4.1E+08 | 3.7E+08 |
| <b>24-Methylcholesta-5,7,22-trien-3<math>\beta</math>-ol (Ergosterol)</b> | 1.5E+12 | 1.7E+12  | 1.5E+12 | 1.6E+12 | 1.2E+12 | 1.9E+12 |
| <b>Cholest-7-en-3<math>\beta</math>-yl acetate</b>                        | –       | 4.7E+07  | 1.4E+08 | 1.7E+08 | 9.5E+07 | 1.6E+08 |
| <b>Cholesta-5,7-dien-3<math>\beta</math>-ol</b>                           | 2.6E+09 | 3.6E+09  | 2.5E+09 | 3.4E+09 | 2.5E+09 | 4.0E+09 |
| <b>3,8-Dihydroxy-6-methoxy-8-methylxanthone</b>                           | 1.3E+10 | 1.6E+10  | 1.6E+10 | 1.7E+10 | 1.3E+10 | 1.8E+10 |

|                             |         |         |         |         |         |         |
|-----------------------------|---------|---------|---------|---------|---------|---------|
| <b>Chrysophanol</b>         | 1.7E+10 | 1.4E+10 | 1.6E+10 | 1.1E+10 | 1.2E+10 | 1.6E+10 |
| <b>Dechlorogriseofulvin</b> | 1.5E+07 | 1.5E+07 | 2.2E+07 | 2.1E+07 | 6.5E+07 | –       |
| <b>Griseofulvin</b>         | 8.2E+09 | 5.4E+09 | 8.4E+09 | 7.1E+09 | 5.8E+09 | 9.1E+09 |
| <b>Norlichexanthone</b>     | 4.0E+09 | 4.8E+09 | 4.1E+09 | 4.9E+09 | 4.1E+09 | 6.3E+09 |

---
